# Supplementary material for: A highly efficient rice green tissue protoplast system for transient gene expression and studying light/chloroplast-related processes
Source: Springer Nature journal article supplement (doi:10.1186/1746-4811-7-30), 2011-09-30

**YFP****mCherry****Chl****Merged****Bright****CD3-998 (Plastid-YFP)  
/CD3-1000 (Plastid-  
mCherry)**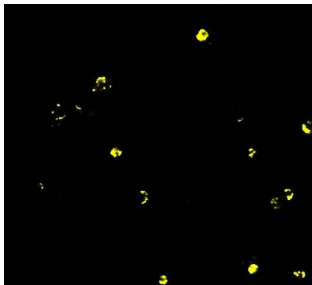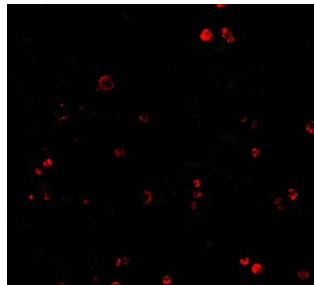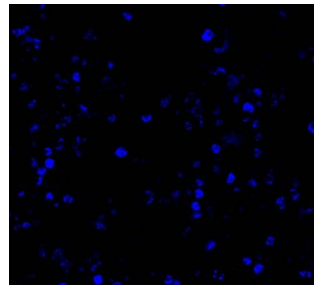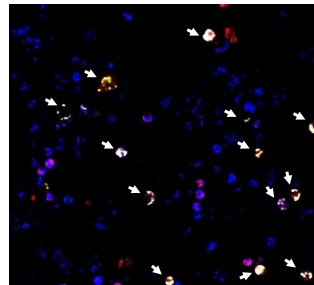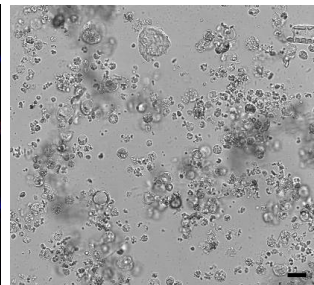**CD3-966 (Golgi-YFP)  
/CD3-1000 (Plastid-  
mCherry)**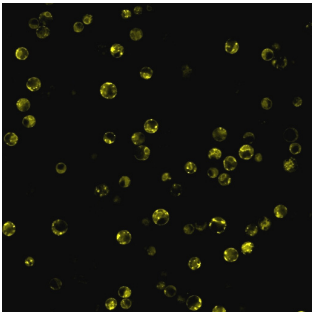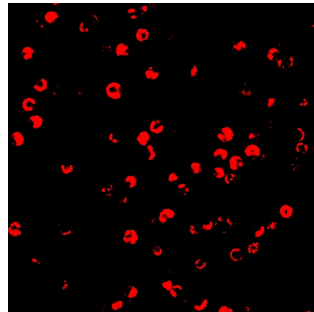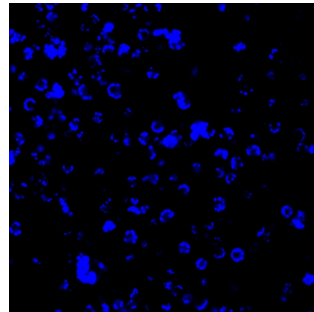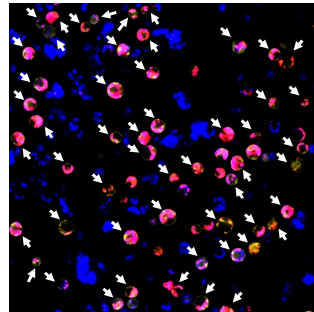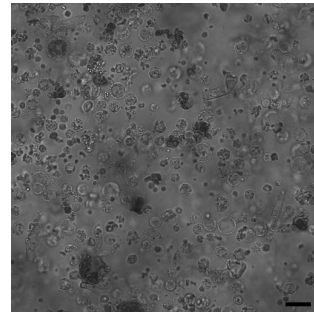

Supplement: 13007_2011_153_MOESM9_ESM.pdf [file 13007_2011_153_MOESM9_ESM.pdf]
